# Table of Contents

Special Issue Guest Co-Editors: John Jungck and Pat Marsteller

## EDITORIAL

### *Introduction to Special Issue*

|                                                                                                                                   |         |
|-----------------------------------------------------------------------------------------------------------------------------------|---------|
| <b>Beyond BIO2010: Integrating Biology and Mathematics: Collaborations, Challenges, and Opportunities</b><br>Pat Marsteller ..... | 141–142 |
|-----------------------------------------------------------------------------------------------------------------------------------|---------|

## FEATURES

### *From the National Academies*

|                                                                                                                                                                               |         |
|-------------------------------------------------------------------------------------------------------------------------------------------------------------------------------|---------|
| <b>“Beyond BIO2010: Celebration and Opportunities” at the Intersection of Mathematics and Biology</b><br>John R. Jungck, Holly D. Gaff, Adam P. Fagen, and Jay B. Labov ..... | 143–147 |
|-------------------------------------------------------------------------------------------------------------------------------------------------------------------------------|---------|

### *Current Insights*

|                                                                             |         |
|-----------------------------------------------------------------------------|---------|
| <b>Recent Research in Science Teaching and Learning</b><br>Erin Dolan ..... | 148–149 |
|-----------------------------------------------------------------------------|---------|

### *WWW.Life Sciences Education*

|                                                      |         |
|------------------------------------------------------|---------|
| <b>Math and Data Exploration</b><br>Dennis Liu ..... | 150–153 |
|------------------------------------------------------|---------|

### *Book Review*

|                                                                  |         |
|------------------------------------------------------------------|---------|
| <b>Physics in a Beautiful Context</b><br>Raquell M. Holmes ..... | 154–156 |
|------------------------------------------------------------------|---------|

### *Educator Highlight*

|                                                                          |         |
|--------------------------------------------------------------------------|---------|
| <b>E. Virginia Armbrust</b><br>Interviewed by Laura L. Mays Hoopes ..... | 157–158 |
|--------------------------------------------------------------------------|---------|

### *Approaches to Biology Teaching and Learning*

|                                                                                                              |         |
|--------------------------------------------------------------------------------------------------------------|---------|
| <b>Order Matters: Using the 5E Model to Align Teaching with How People Learn</b><br>Kimberly D. Tanner ..... | 159–164 |
|--------------------------------------------------------------------------------------------------------------|---------|

## ESSAYS

### **Toward Integration: From Quantitative Biology to Mathbio-Biomath?**

|                                                                                                                                                      |         |
|------------------------------------------------------------------------------------------------------------------------------------------------------|---------|
| Pat Marsteller, Lisette de Pillis, Ann Findley, Karl Joplin, John Pelesko, Karen Nelson, Katerina Thompson,<br>David Usher, and Joseph Watkins ..... | 165–171 |
|------------------------------------------------------------------------------------------------------------------------------------------------------|---------|

### **Bioinformatics and the Undergraduate Curriculum Essay**

|                                                                                                        |         |
|--------------------------------------------------------------------------------------------------------|---------|
| Mark Maloney, Jeffrey Parker, Mark LeBlanc, Craig T. Woodard, Mary Glackin, and Michael Hanrahan ..... | 172–174 |
|--------------------------------------------------------------------------------------------------------|---------|

### **BioMaPS: A Roadmap for Success**

|                                             |         |
|---------------------------------------------|---------|
| Maeve L. McCarthy and K. Renee Fister ..... | 175–180 |
|---------------------------------------------|---------|

### **A Transformative Model for Undergraduate Quantitative Biology Education**

|                                                                                                                                                            |         |
|------------------------------------------------------------------------------------------------------------------------------------------------------------|---------|
| David C. Usher, Tobin A. Driscoll, Prasad Dhurjati, John A. Pelesko, Louis F. Rossi, Gilberto Schleiniger,<br>Kathleen Pusecker, and Harold B. White ..... | 181–188 |
|------------------------------------------------------------------------------------------------------------------------------------------------------------|---------|

### **Mathematics, Thermodynamics, and Modeling to Address Ten Common Misconceptions about Protein Structure, Folding, and Stability**

|                       |         |
|-----------------------|---------|
| Srebrenka Robic ..... | 189–195 |
|-----------------------|---------|

### **Connecting Biology and Mathematics: First Prepare the Teachers**

|                    |         |
|--------------------|---------|
| Andrej Šorgo ..... | 196–200 |
|--------------------|---------|

### **Mathematical Manipulative Models: In Defense of “Beanbag Biology”**

|                                                          |         |
|----------------------------------------------------------|---------|
| John R. Jungck, Holly Gaff, and Anton E. Weisstein ..... | 201–211 |
|----------------------------------------------------------|---------|

### **Impact of Interdisciplinary Undergraduate Research in Mathematics and Biology on the Development of a New Course Integrating Five STEM Disciplines**

|                                                                |         |
|----------------------------------------------------------------|---------|
| Lester Caudill, April Hill, Kathy Hoke, and Ovidiu Lipan ..... | 212–216 |
|----------------------------------------------------------------|---------|

### **Enhancing Interdisciplinary Mathematics and Biology Education: A Microarray Data Analysis Course Bridging These Disciplines**

|                                         |         |
|-----------------------------------------|---------|
| Yolande V. Tra and Irene M. Evans ..... | 217–226 |
|-----------------------------------------|---------|

## ARTICLES

|                                                                                                                                                                                                                                              |         |
|----------------------------------------------------------------------------------------------------------------------------------------------------------------------------------------------------------------------------------------------|---------|
| <b>Mathematical Biology Modules Based on Modern Molecular Biology and Modern Discrete Mathematics</b><br>Raina Robeva, Robin Davies, Terrell Hodge, and Alexander Enyedi.....                                                                | 227–240 |
| <b>An Initiative to Broaden Diversity in Undergraduate Biomathematics Training</b><br>Gregory Goins, Mingxiang Chen, Catherine White, Dominic Clemence, Thomas Redd, and Vinaya Kelkar ....                                                  | 241–247 |
| <b>From Biology to Mathematical Models and Back: Teaching Modeling to Biology Students, and Biology to Math and Engineering Students</b><br>Hillel J. Chiel, Jeffrey M. McManus, and Kendrick M. Shaw .....                                  | 248–265 |
| <b>Evaluating a Modeling Curriculum by Using Heuristics for Productive Disciplinary Engagement</b><br>Julia Svoboda and Cynthia Passmore .....                                                                                               | 266–276 |
| <b>Online Interactive Teaching Modules Enhance Quantitative Proficiency of Introductory Biology Students</b><br>Katerina V. Thompson, Kären C. Nelson, Gili Marbach-Ad, Michael Keller, and William F. Fagan .....                           | 277–283 |
| <b>Interdisciplinary Training in Mathematical Biology through Team-based Undergraduate Research and Courses</b><br>Jason E. Miller and Timothy Walston .....                                                                                 | 284–289 |
| <b>Using the Principles of <i>BIO2010</i> to Develop an Introductory, Interdisciplinary Course for Biology Students</b><br>Kelly E. Matthews, Peter Adams, and Merrilyn Goos .....                                                           | 290–297 |
| <b>On a Calculus-based Statistics Course for Life Science Students</b><br>Joseph C. Watkins .....                                                                                                                                            | 298–310 |
| <b>Preparing the “New” Biologist of the Future: Student Research at the Interface of Mathematics and Biology</b><br>Sarah I. Duncan, Pamela Bishop, and Suzanne Lenhart.....                                                                 | 311–315 |
| <b>Team Research at the Biology–Mathematics Interface: Project Management Perspectives</b><br>John G. Milton, Ami E. Radunskaya, Arthur H. Lee, Lisette G. de Pillis, and Diana F. Bartlett .....                                            | 316–322 |
| <b>1, 2, 3, 4: Infusing Quantitative Literacy into Introductory Biology</b><br>Elena Bray Speth, Jennifer L. Momsen, Gregory A. Moyerbrailean, Diane Ebert-May, Tammy M. Long,<br>Sara Wyse, and Debra L. Linton .....                       | 323–332 |
| <b>How to Build a Course in Mathematical–Biological Modeling: Content and Processes for Knowledge and Skill</b><br>Anne-Marie Hoskinson .....                                                                                                | 333–341 |
| <b>SYMBIOSIS: Development, Implementation, and Assessment of a Model Curriculum across Biology and Mathematics at the Introductory Level</b><br>Audrey M. Depelteau, Karl H. Joplin, Aimee Govett, Hugh A. Miller, III, and Edith Seier..... | 342–347 |
| <b>RNA Secondary Structure Prediction by Using Discrete Mathematics: An Interdisciplinary Research Experience for Undergraduate Students</b><br>Roni Ellington, James Wachira, and Asamoah Nkwanta.....                                      | 348–356 |
| <b>Computer Literacy for Life Sciences: Helping the Digital-Era Biology Undergraduates Face Today’s Research</b><br>Tomasz G. Smolinski.....                                                                                                 | 357–363 |
| <b>Developing Student Collaborations across Disciplines, Distances, and Institutions</b><br>Jeff Knisley and Esfandiar Behravesh .....                                                                                                       | 364–369 |
| <b>Introductory Life Science Mathematics and Quantitative Neuroscience Courses</b><br>Dwight Duffus and Andrei Olifer.....                                                                                                                   | 370–377 |

### *On the Cover*

To highlight the focus of this special issue on how biology and mathematics educators and researchers have addressed the recommendations of *BIO2010* to include much more mathematics in biology education, and to develop collaborations with one another that includes their research programs, the cover features an activity developed by Professor Andrej Šorgo from the University of Maribor in Slovenia (see page 206). He and his students have produced a human fractal complete with iteration of self-similar objects; namely, themselves. He employs this pedagogical exercise to introduce new mathematics like fractal geometry and chaos theory that are important in contemporary biology but to which most biology students have not yet been exposed. We chose this photo because it clearly represents student engagement with mathematical ideas in an aesthetic activity and demonstrates the internationalism of the problem of the need to include more mathematics in the education of biologists.
